# Supplementary material for: SRSF6 balances mitochondrial-driven innate immune outcomes through alternative splicing of BAX
Source: eLife journal article supplement (doi:10.7554/elife.82244), 2022-11-21
Supplement: figures [file elife-82244-figures-v2.pdf]

---

## Figures and figure supplements

SRSF6 balances mitochondrial-driven innate immune outcomes through alternative splicing of BAX

**Allison R Wagner *et al.***

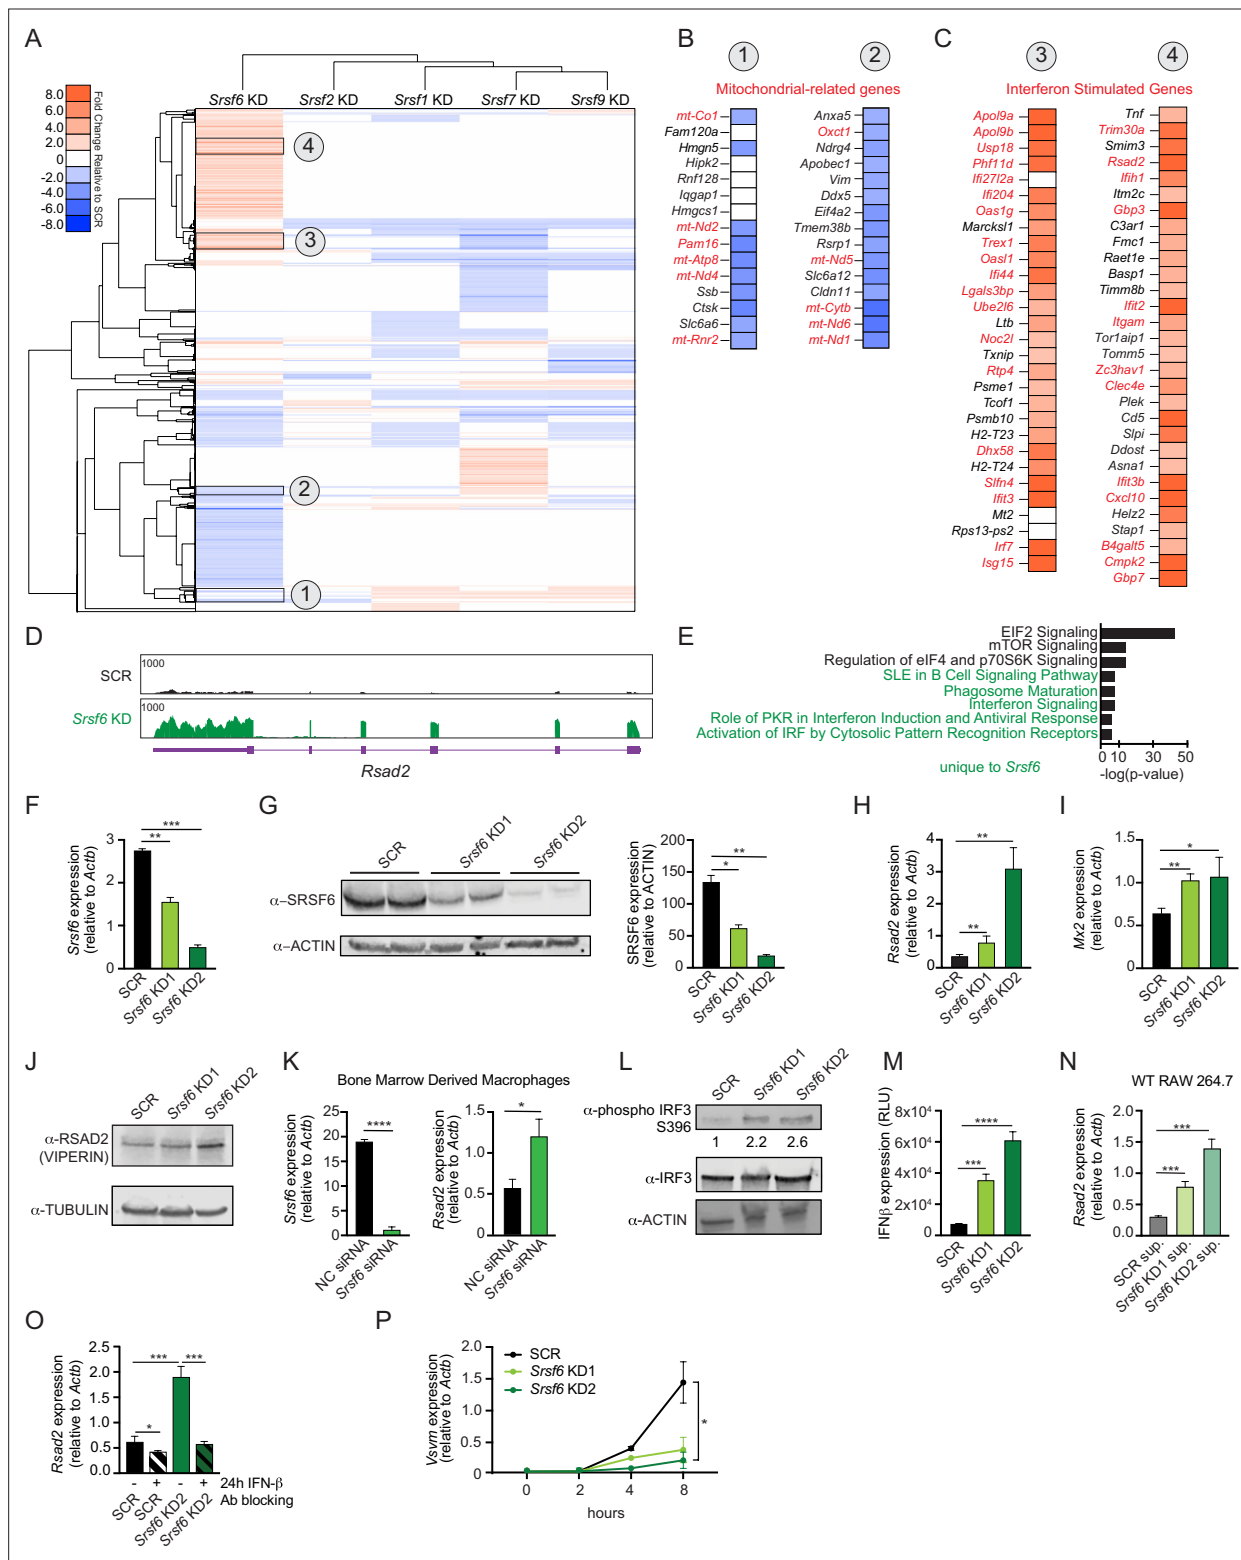

**Figure 1.** SRSF6 controls basal type I interferon expression in macrophages. **(A)** Heatmap of differentially expressed genes after knockdown of *Srsf1*, 2, 6, 7, and 9 in RAW 264.7 macrophage-like cell lines (RAW MΦ) relative to a scramble (SCR) shRNA control. **(B)** Differential gene expression of mitochondria related genes (red) in *Srsf6* KD RAW MΦ. **(C)** As in B but highlighting ISGs (red). **(D)** Integrative Genomics Viewer (IGV) tracks of *Rsad2* from *Srsf6* KD macrophage RNA seq. **(E)** Ingenuity Pathway Analysis showing canonical pathways from *Srsf6* KD RAW MΦ RNA seq. Green indicates pathways unique to SRSF6. **(F)** RT-qPCR of *Srsf6* in *Srsf6* KD RAW MΦ. **(G)** Immunoblot of SRSF6 in *Srsf6* KD RAW MΦ. **(H)** RT-qPCR of *Rsad2* in *Srsf6* KD RAW MΦ. **(I)** RT-qPCR of *Mx2* in *Srsf6* KD RAW MΦ. **(J)** Immunoblot of α-RSAD2 (VIPERIN) and α-TUBULIN in *Srsf6* KD RAW MΦ. **(K)** Bone Marrow Derived Macrophages (BMDMs) treated with NC siRNA or *Srsf6* siRNA. RT-qPCR of *Srsf6* and *Rsad2* expression. **(L)** Immunoblot of α-phospho IRF3 S396, α-IRF3, and α-ACTIN in *Srsf6* KD RAW MΦ. **(M)** RT-qPCR of IFNβ expression (RLU) in *Srsf6* KD RAW MΦ. **(N)** WT RAW 264.7 cells treated with SCR sup, *Srsf6* KD1 sup, or *Srsf6* KD2 sup. RT-qPCR of *Rsad2* expression. **(O)** RT-qPCR of *Rsad2* expression in *Srsf6* KD RAW MΦ treated with 24h IFN-β and Ab blocking. **(P)** Line graph of *Vsmn* expression over 8 hours in *Srsf6* KD RAW MΦ.

Figure 1 continued on next page

## Figure 1 continued

KD RAW MΦ. (I) RT-qPCR of *Mx2* in *Srsf6* KD RAW MΦ. (J) Immunoblot of RSAD2 (VIPERIN) in *Srsf6* KD RAW MΦ. (K) RT-qPCR of *Srsf6* and *Rsad2* in *Srsf6* siRNA KD BMDMs compared with a negative control (NC) siRNA control. (L) As in G but for phosphorylated IRF3 and total IRF3. Numbers indicate densitometric measurements of pIRF3 (LICOR). (M) Protein quantification of extracellular IFNβ in *Srsf6* KD RAW MΦ measured by relative light units (RLU). (N) RT-qPCR of *Rsad2* in WT RAW MΦ incubated with SCR or *Srsf6* KD RAW MΦ supernatants for 24 h. (O) RT-qPCR of *Rsad2* in *Srsf6* KD RAW MΦ given IFNβ neutralizing antibody treatment for 24 h. (P) VSV replication in *Srsf6* KD RAW MΦ at 0, 2, 4, 8 hr post infection (MOI = 1) measured by RT-qPCR of *Vsvm*. All data are compared with a SCR control unless indicated. Data are expressed as a mean of three or more biological replicates with error bars depicting SEM. Statistical significance was determined using two tailed unpaired student's t test. \*= $p < 0.05$ , \*\*= $p < 0.01$ , \*\*\*= $p < 0.001$ , \*\*\*\*= $p < 0.0001$ .

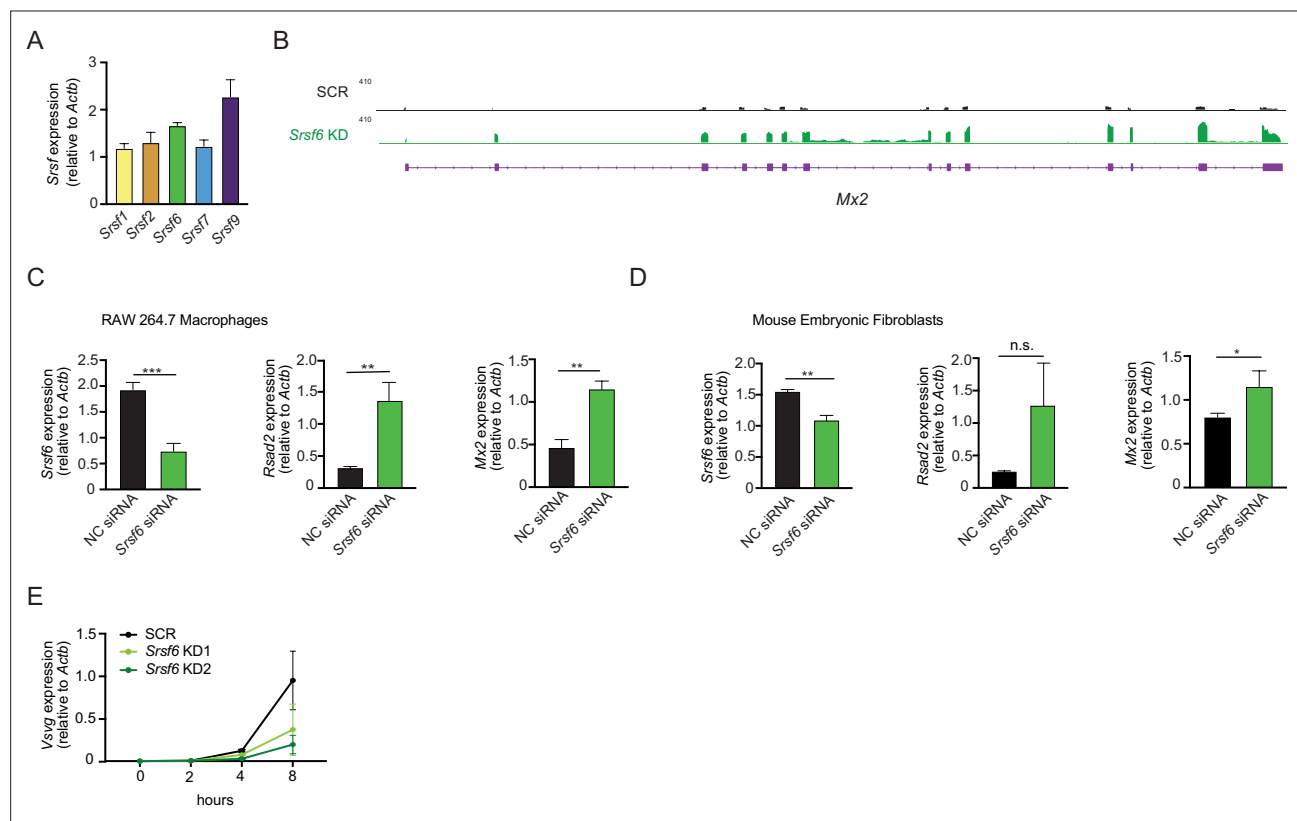

**Figure 1—figure supplement 1.** Loss of SRSF6 upregulates interferon stimulated genes. **(A)** RT-qPCR of *Srsf* in RAW MΦ. **(B)** Integrative Genomics Viewer (IGV) tracks of *Mx2* in *Srsf6* KD RAW MΦ. **(C)** RT-qPCR of *Srsf6*, *Rsad2*, and *Mx2* in *Srsf6* siRNA KD RAW MΦ. **(D)** As in C but in MEFs. **(E)** VSV replication in *Srsf6* KD RAW MΦ at 0, 2, 4, 8 hr post infection (MOI = 1) measured by RT-qPCR of *Vsvg*. All data is compared with a SCR control unless indicated. Data are expressed as a mean of three or more biological replicates with error bars depicting SEM. Statistical significance was determined using two tailed unpaired student's t test. \*= $p < 0.05$ , \*\*= $p < 0.01$ , \*\*\*= $p < 0.001$ , \*\*\*\*= $p < 0.0001$ .

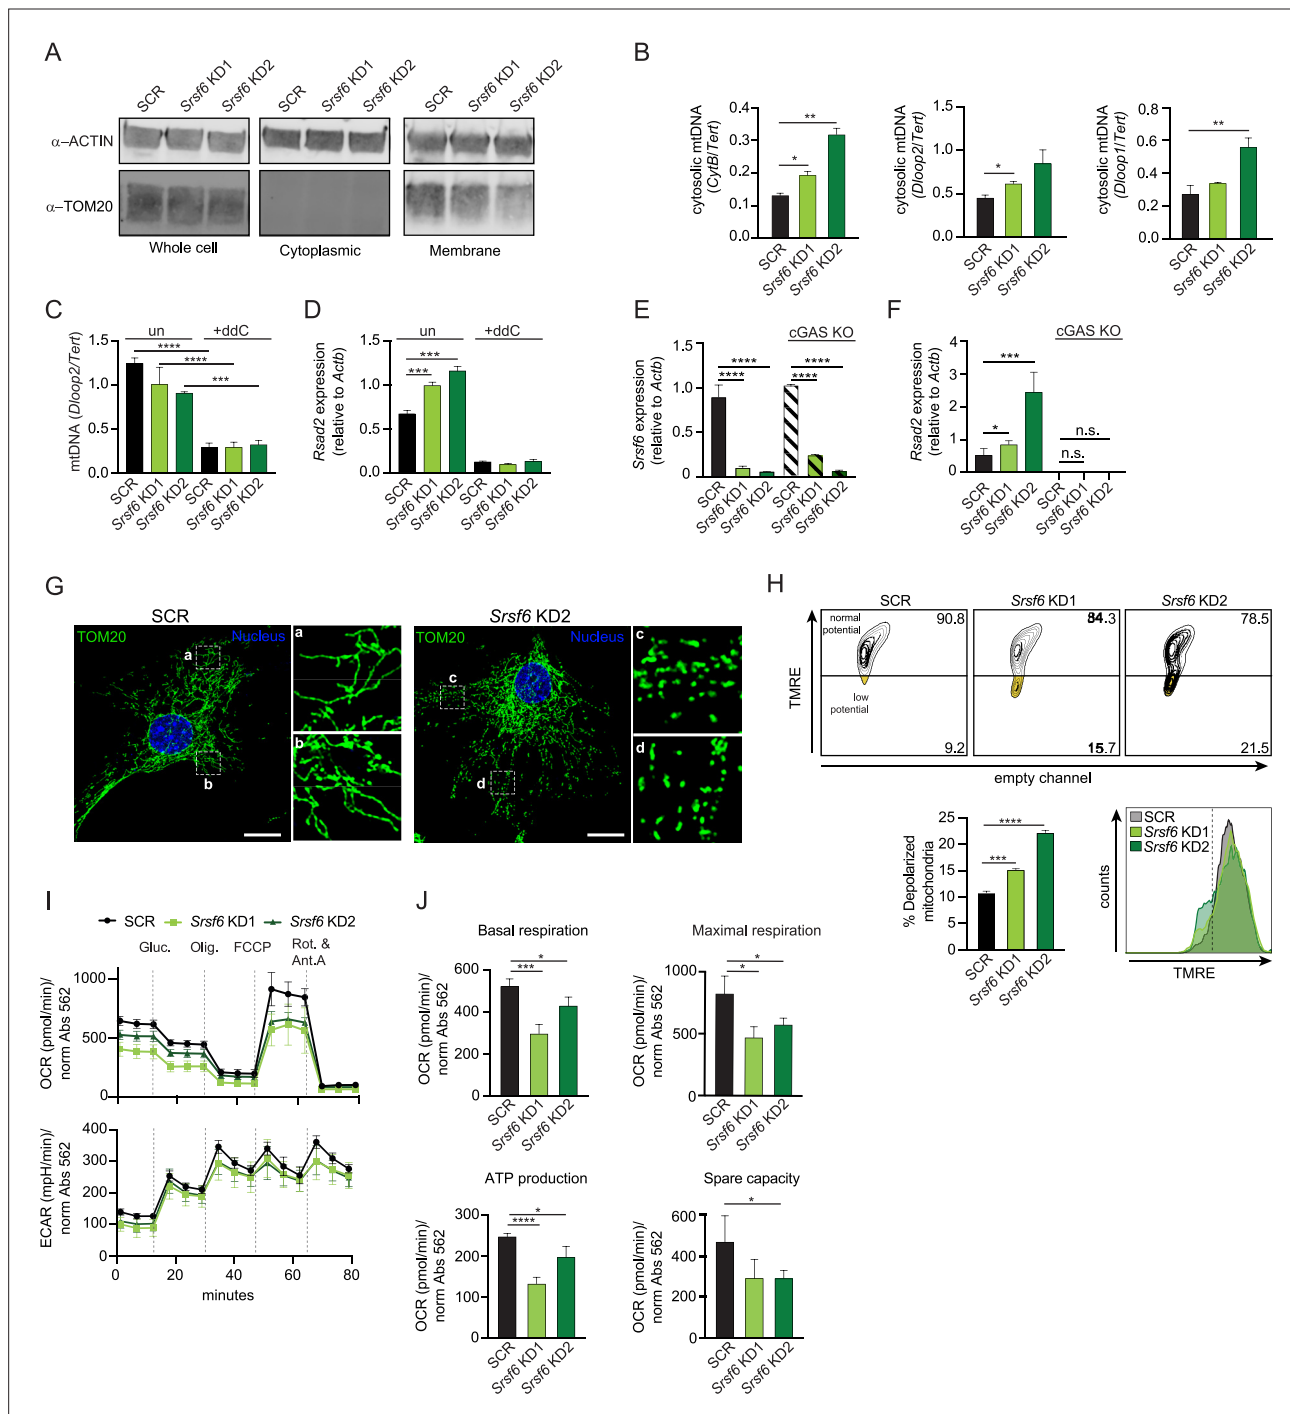

**Figure 2.** SRSF6 limits cytosolic mtDNA release by maintaining mitochondrial homeostasis. **(A)** Immunoblot of mitochondria (TOM20) in total, cytoplasmic, and membrane fractions of *Srsf6* KD RAW MΦ. **(B)** RT-qPCR of mtDNAs *CytB*, *Dloop1*, *Dloop2* relative to nuclear DNA *Tert* in cytosolic fractions of *Srsf6* KD RAW MΦ. **(C)** RT-qPCR of total mtDNA *Dloop2* relative to nuclear DNA *Tert* in *Srsf6* KD and SCR control RAW MΦ with or without mtDNA depletion for 8 days. **(D)** As in C but measuring *Rsad2*. **(E)** RT-qPCR of *Srsf6* in cGAS KO RAW MΦ. **(F)** As in E but measuring *Rsad2*. **(G)** Immunofluorescence microscopy images visualizing mitochondria in *Srsf6* KD MEFs immunostained with TOM20. Scale bar = 10 μm. **(H)** Mitochondria membrane potential measured by TMRE staining of *Srsf6* KD RAW MΦ. **(I)** Oxygen consumption rate (OCAR) and Extracellular acidification rate (ECAR) measured by Seahorse in *Srsf6* KD RAW MΦ. **(J)** Basal respiration, maximal respiration, ATP production, and spare capacity of *Srsf6* KD RAW MΦ determined by OCAR analysis. All data are compared with a SCR control unless indicated. Data are expressed as a mean of three or more biological replicates with error bars depicting SEM. Statistical significance was determined using two tailed unpaired student's t test. \*= $p < 0.05$ , \*\*= $p < 0.01$ , \*\*\*= $p < 0.001$ , \*\*\*\*= $p < 0.0001$ .

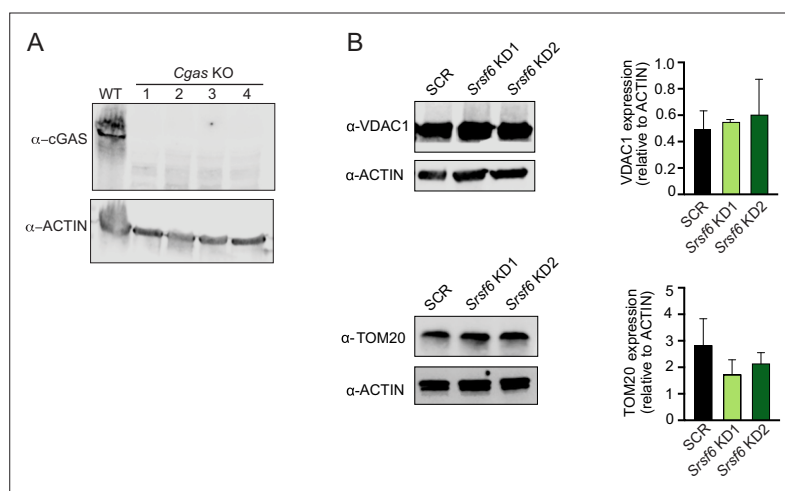

**Figure 2—figure supplement 1.** Mitochondrial protein levels in *Srsf6* KD macrophages.

(A) Immunoblot of cGAS in WT and cGAS KO RAW MΦ. cGAS lanes are from multiple protein preparations. (B) Immunoblots of VDAC1 (top) and TOM20 (bottom) in *Srsf6* KD RAW MΦ. Data are expressed as a mean of three or more biological replicates with error bars depicting SEM. Statistical significance was determined using two tailed unpaired student's t test. \* $p < 0.05$ , \*\* $p < 0.01$ , \*\*\* $p < 0.001$ , \*\*\*\* $p < 0.0001$ .

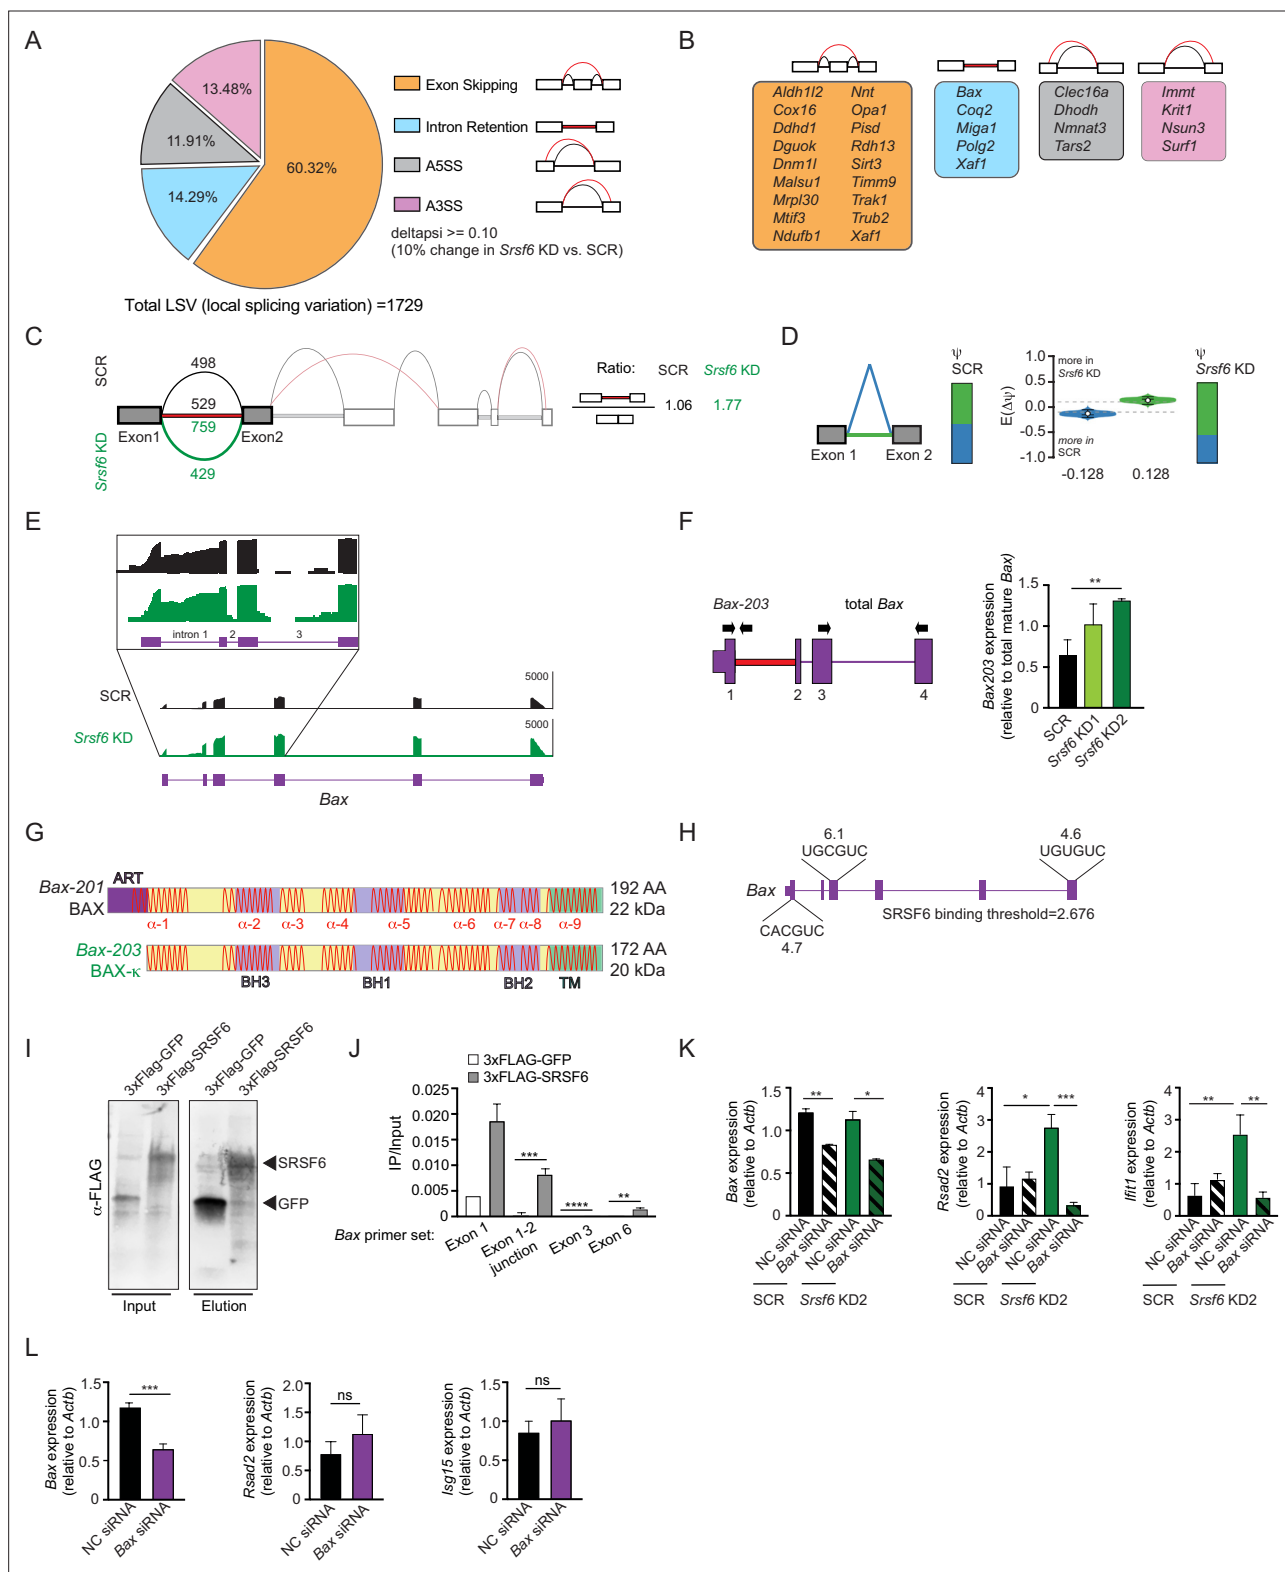

**Figure 3.** SRSF6 controls alternative splicing of the mitochondrial apoptotic factor BAX. **(A)** Percentages of alternative splicing (AS) events in *Srsf6* KD RAW MΦ (deltapsi  $\geq 0.1$ ). **(B)** Categorization of alternative splicing events in mitochondria genes differentially expressed in *Srsf6* KD RAW MΦ. Red lines are AS events and black lines are WT events. **(C)** Splice graph of *Bax* in SCR (top) and *Srsf6* KD (bottom) RAW MΦ generated by MAJIQ/VOILA. Intron 1 retention reads relative to exon1-2 junction reads in each genotype shown on right. **(D)** MAJIQ  $\Psi$  quantification of junctions as illustrated in **(C)** from SCR (left) and *Srsf6* KD (right) RAW MΦ. Intron retention displayed in green; intron removal displayed in blue. **(E)** Integrative Genomics Viewer (IGV)

Figure 3 continued on next page

## Figure 3 continued

tracks of *Bax*, highlighting exon 1 to exon 3. Zoom-in (top) uses a log scale to facilitate appreciation of the intron reads. (F) RT-qPCR of *Bax*203 relative to mature *Bax* expression in *Srsf6* KD RAW MΦ. Primers shown on schematic. (G) Schematics of BAX and BAX- $\kappa$  proteins. Alpha-helical domains shown as red lines. ART = apoptosis regulatory targeting domain (Goping et al., 1998). (H) Diagram of predicted *Srsf6* binding sites in *Bax* pre-mRNA with predicted binding strength scores (from ESE Finder). (I) CLIP Immunoblot of 3xFLAG-GFP and 3xFLAG-SRSF6 constructs expressed in RAW MΦ for 24 h. (J) CLIP RT-qPCR of 3xFLAG-GFP and 3xFLAG-SRSF6 RT-qPCR of *Bax* exon 1, exon1-2 junction, exon 3, and exon 6. Data shown as IP relative to input. (K) RT-qPCR of *Bax*, *Rsad2*, and *Isg15* in *Srsf6* KD RAW MΦ with *Bax* KD via siRNA transfection. (L) RT-qPCR of *Bax*, *Rsad2*, and *Isg15* in transient *Bax* KD RAW MΦ. All data are compared with a SCR control unless indicated. Data are expressed as a mean of three or more biological replicates with error bars depicting SEM. Statistical significance was determined using two tailed unpaired student's t test. \*= $p < 0.05$ , \*\*= $p < 0.01$ , \*\*\*= $p < 0.001$ , \*\*\*\*= $p < 0.0001$ .



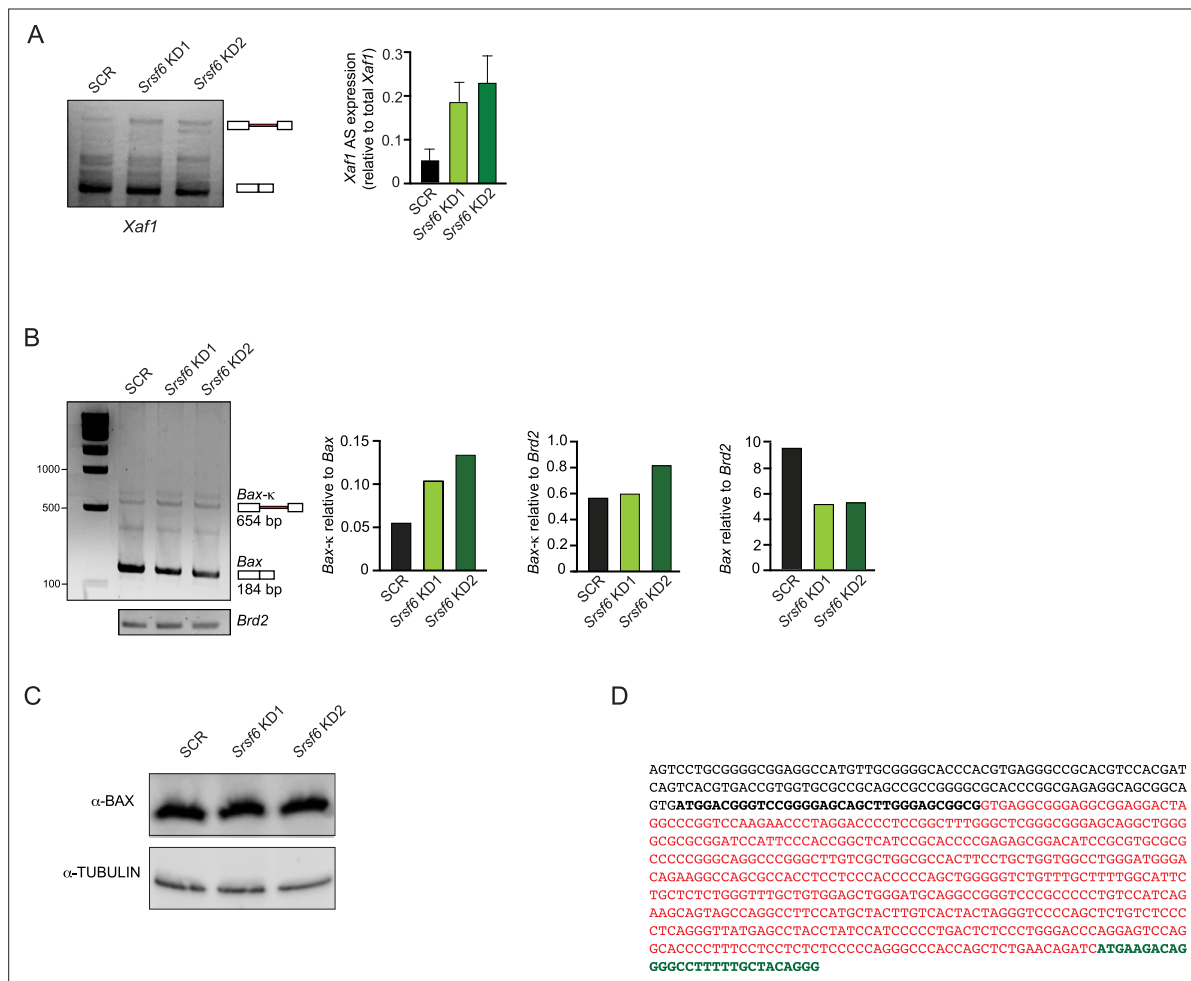

**Figure 3—figure supplement 1.** Loss of SRSF6 impacts alternative splicing of transcripts with known roles in mitochondrial biology.

(A) Semi-quantitative RT-PCR of *Xaf1* in *Srsf6* KD RAW MΦ with quantification. (B) Semi-quantitative RT-PCR of *Bax* and *Brd2* (control) in *Srsf6* KD RAW MΦ with densitometric quantification (LICOR) on right. Gel shown is representative of  $n > 3$ . (C) Immunoblot of BAX in *Srsf6* KD RAW MΦ. (D) mRNA sequence of *Bax*201 with *Bax*203 truncated isoform (red). All data are compared with a SCR control unless indicated. Data are expressed as a mean of three or more biological replicates with error bars depicting SEM. Statistical significance was determined using two tailed unpaired student's t test. \* =  $p < 0.05$ , \*\* =  $p < 0.01$ , \*\*\* =  $p < 0.001$ , \*\*\*\* =  $p < 0.0001$ .

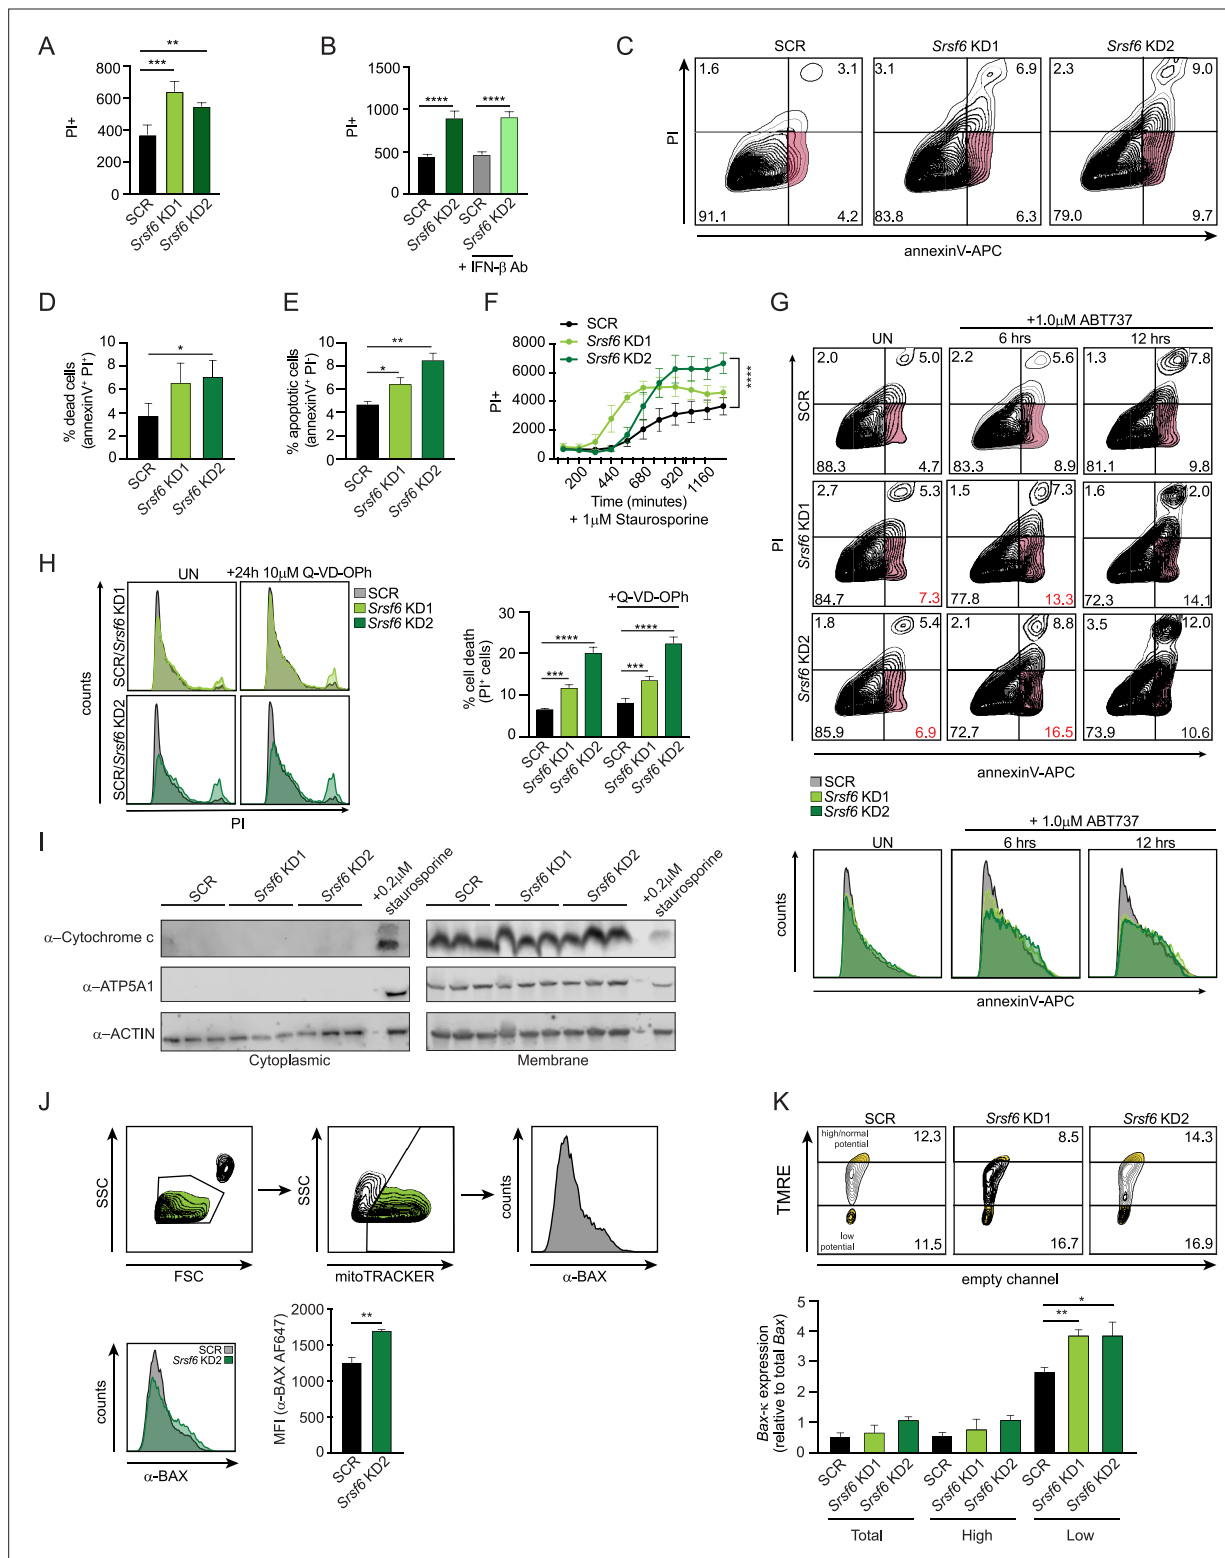

**Figure 4.** Loss of SRSF6 sensitizes macrophages to caspase-independent apoptotic cell death. **(A)** Cell death in *Srsf6* KD RAW M $\Phi$  measured by live cell imaging of propidium iodide (PI) staining. **(B)** Cell death in *Srsf6* KD RAW M $\Phi$  treated with IFN- $\beta$  neutralizing antibody. **(C)** Apoptotic cell death measured by flow cytometry using APC conjugated annexin V (annexinV-APC) and propidium iodide (PI) dyes in *Srsf6* KD RAW M $\Phi$ . **(D)** Quantification of dead cells in *Srsf6* KD RAW M $\Phi$  from C. **(E)** Quantification of apoptotic cells in *Srsf6* KD RAW M $\Phi$  from C. **(F)** Cell death over a time course in *Srsf6* KD RAW 264.7 cells treated with 1  $\mu$ M staurosporine. **(G)** Apoptotic cell death over a time course measured by flow cytometry using annexinV-APC and PI in *Srsf6* KD RAW M $\Phi$  treated with 1  $\mu$ M ABT737. Histograms display annexinV-APC single stain in *Srsf6* KD. Red numbers indicate annexinV+/PI+ cells.

Figure 4 continued on next page

## Figure 4 continued

PI- cells in *Srsf6* KDs. (H) Histogram showing cell death after caspase inhibition by flow cytometry in *Srsf6* KD RAW MΦ. Cell death quantification (right). (I) Immunoblot of cytochrome c in cytoplasmic and membrane fractions of *Srsf6* KD RAW 264.7 cells. SCR cells treated with 0.2 μM staurosporine for 24 h used as a positive control. (J) Schematic of mitoFLOW workflow (top). Histogram showing BAX accumulation on *Srsf6* KD RAW MΦ isolated mitochondria (bottom) (K) Mitochondria membrane potential measured by TMRE staining of *Srsf6* KD RAW MΦ (top). RT-qPCR of BAX-κ relative to mature *Bax* expression in total, high, and low mitochondria membrane potential cell populations. All data are compared with a SCR control unless indicated. Data are expressed as a mean of three or more biological replicates with error bars depicting SEM. Statistical significance was determined using two tailed unpaired student's *t* test. \*= $p < 0.05$ , \*\*= $p < 0.01$ , \*\*\*= $p < 0.001$ , \*\*\*\*= $p < 0.0001$ .

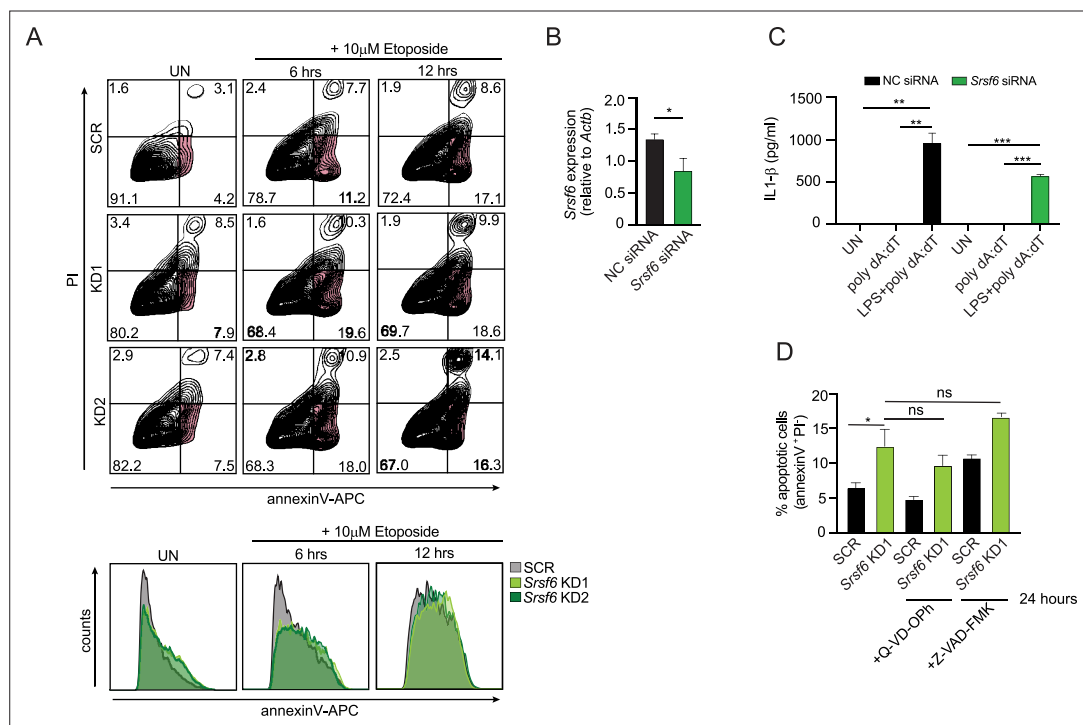

**Figure 4—figure supplement 1.** *Srsf6* KD cells are sensitive to cell death agonists. **(A)** Apoptotic cell death over a time course measured by flow cytometry using annexinV-APC and PI in *Srsf6* KD RAW M $\Phi$  treated with 10  $\mu$ M etoposide. Histograms display annexinV-APC single stain in *Srsf6* KD RAW M $\Phi$ . **(B)** RT-qPCR of *Srsf6* in *Srsf6* siRNA KD BMDMs. **(C)** Extracellular IL-1 $\beta$  in negative siRNA control and *Srsf6* KD BMDMs untreated and inflammasome treated with LPS 3 hr, poly dA:dT 4 hr by ELISA with AIM2 inflammasome stimulated positive control (LPS/ poly dA:dT). **(D)** Apoptotic cells (AnnexinV+/PI-) quantification in *Srsf6* KD RAW M $\Phi$  treated with caspase inhibitors Q-VD-OPh and Z-VAD-FMK for 24 hr. All data are compared with a scramble control unless indicated. Data are expressed as a mean of three or more biological replicates with error bars depicting SEM. Statistical significance was determined using two tailed unpaired student's *t* test. \*=*p* < 0.05, \*\*=*p* < 0.01, \*\*\*=*p* < 0.001, \*\*\*\*=*p* < 0.0001.

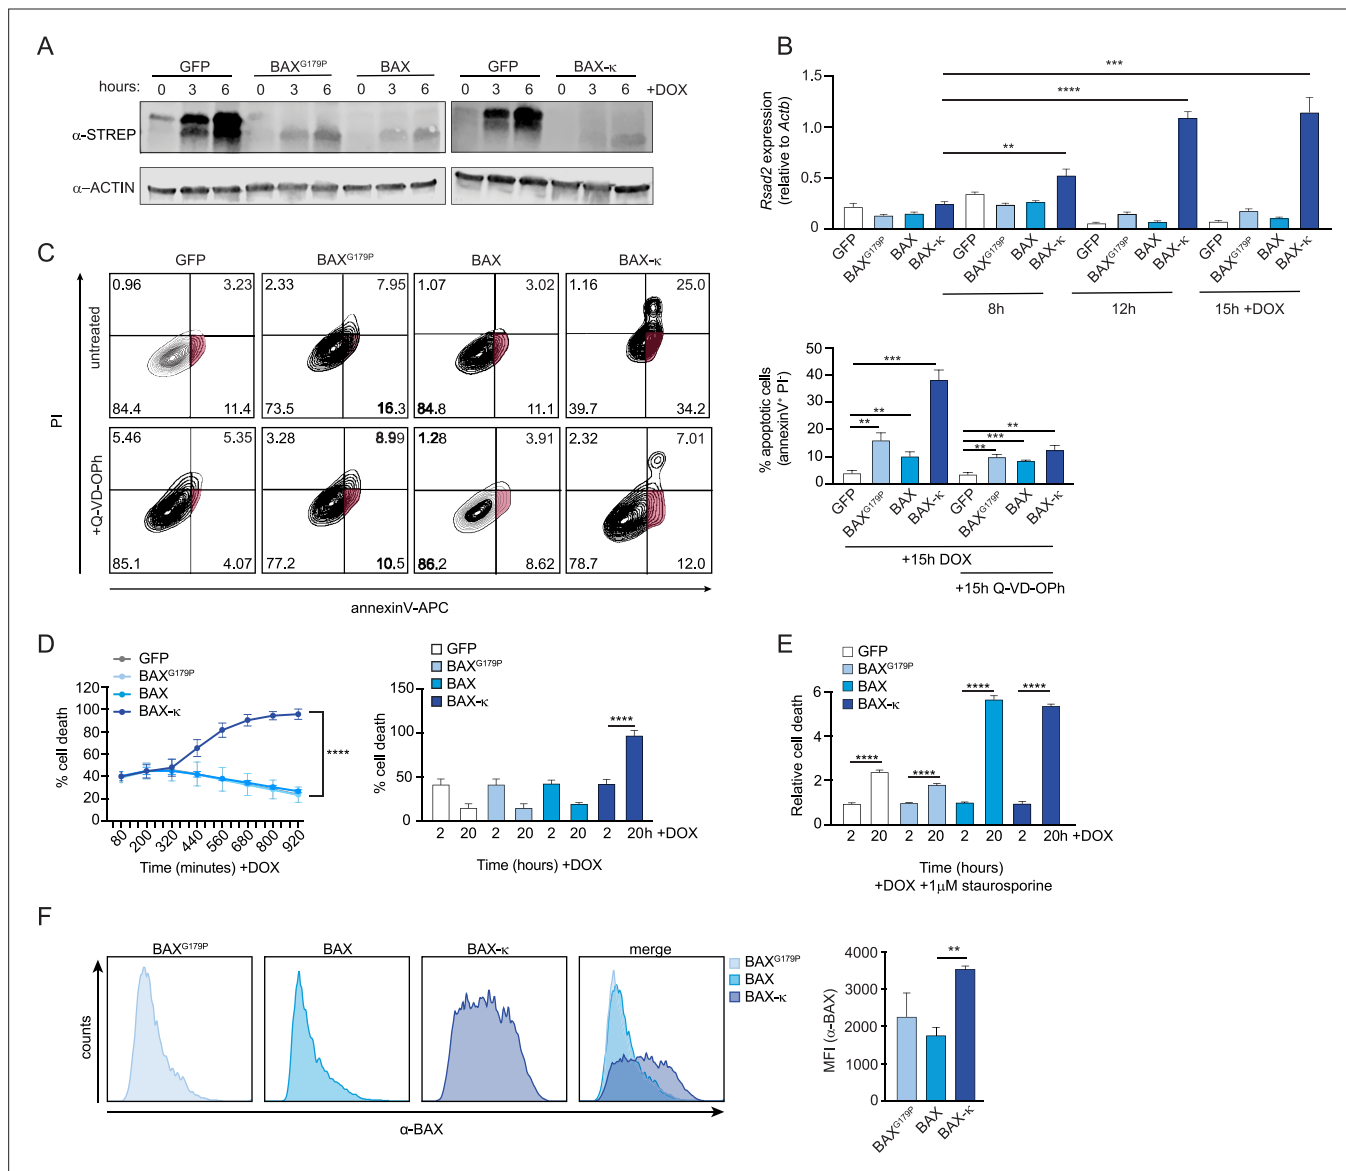

**Figure 5.** Expression of BAX- $\kappa$  promotes type I IFN expression and cell death in macrophages. **(A)** Immunoblot of strep tagged BAX<sup>G179P</sup>, BAX, and BAX- $\kappa$  inducible RAW M $\Phi$  expressed over a time course after addition of doxycycline (DOX). **(B)** Expression of *Rsad2* over a time course of 8, 12, and 15 hr after DOX induction in GFP, BAX<sup>G179P</sup>, BAX, and BAX- $\kappa$ -expressing RAW M $\Phi$  by RT-qPCR. **(C)** Apoptotic cell death measured by flow cytometry using annexinV-APC and PI in GFP, BAX<sup>G179P</sup>, BAX, and BAX- $\kappa$  inducible macrophages expressed for 15 hr with 1  $\mu$ M DOX and caspase inhibitor (10  $\mu$ M Q-VD-OPh). Apoptotic cells (AnnexinV+/PI-) quantification (right). **(D)** Cell death over a time course after DOX induced expression of GFP, BAX<sup>G179P</sup>, BAX, and BAX- $\kappa$ . Starting and ending cell death (PI+) shown as a bar graph on right. **(E)** Relative cell death measured by PI incorporation at 2 and 20 hr after DOX-induced expression of GFP, BAX<sup>G179P</sup>, BAX, and BAX + addition of 1  $\mu$ M staurosporine. **(F)** Histogram showing BAX accumulation on 20 h DOX-induced GFP, BAX<sup>G179P</sup>, BAX, and BAX isolated mitochondria. Data are expressed as a mean of three or more biological replicates with error bars depicting SEM. Statistical significance was determined using two tailed unpaired student's *t* test. \**p* < 0.05, \*\**p* < 0.01, \*\*\**p* < 0.001, \*\*\*\*=*p* < 0.0001.

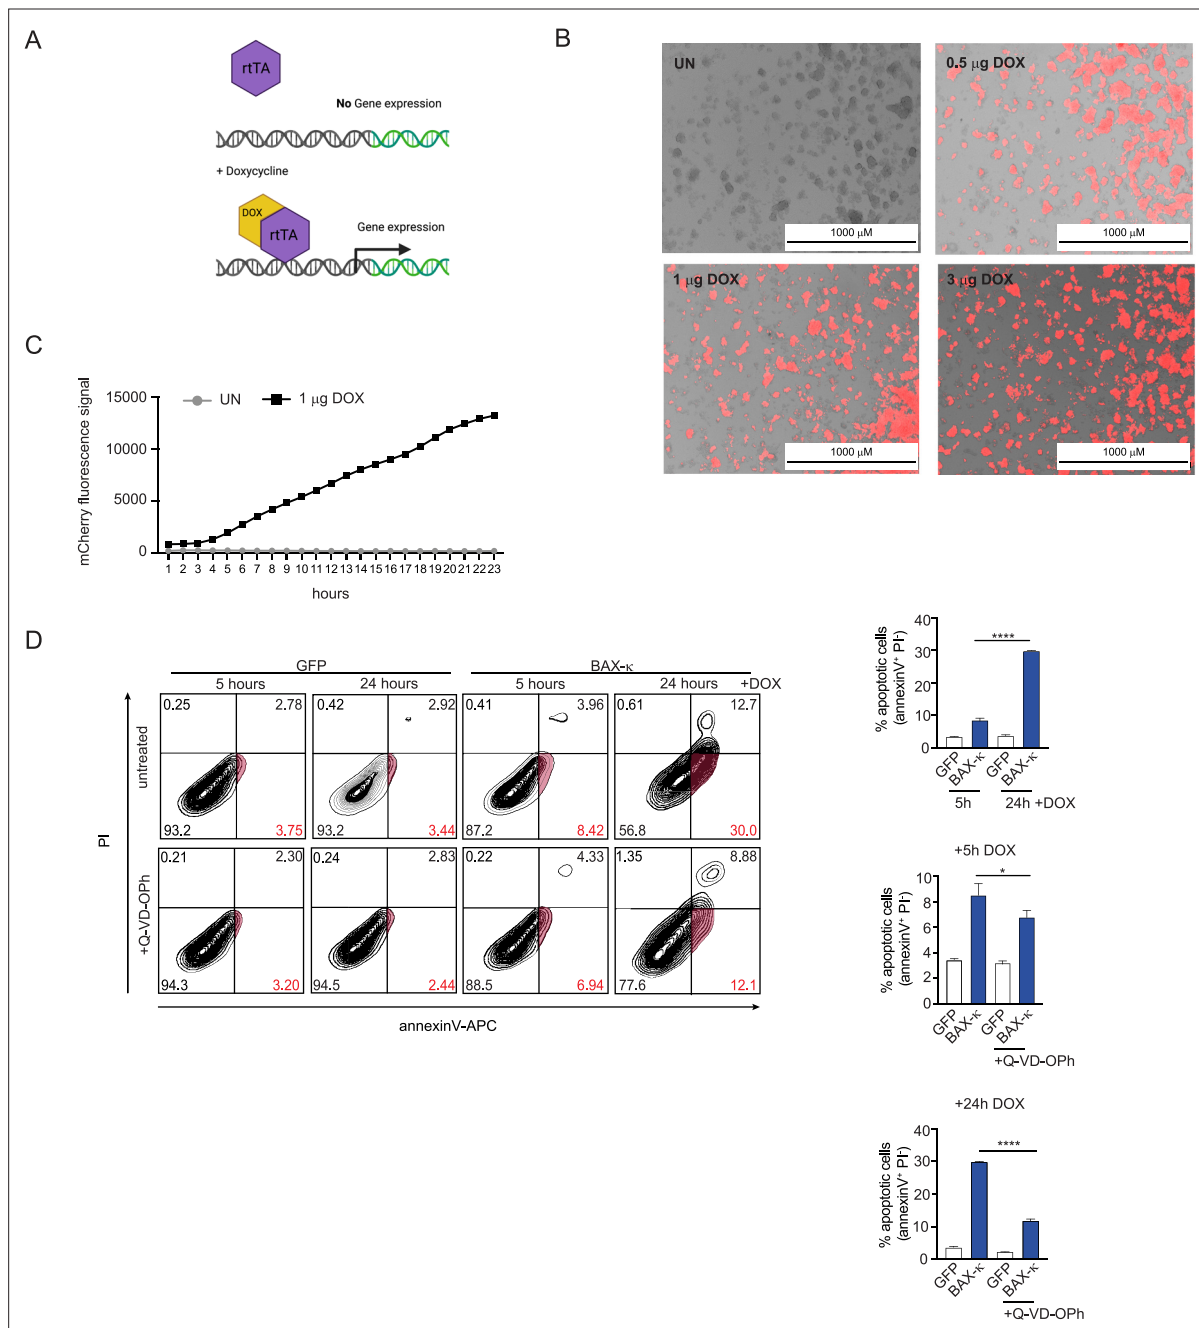

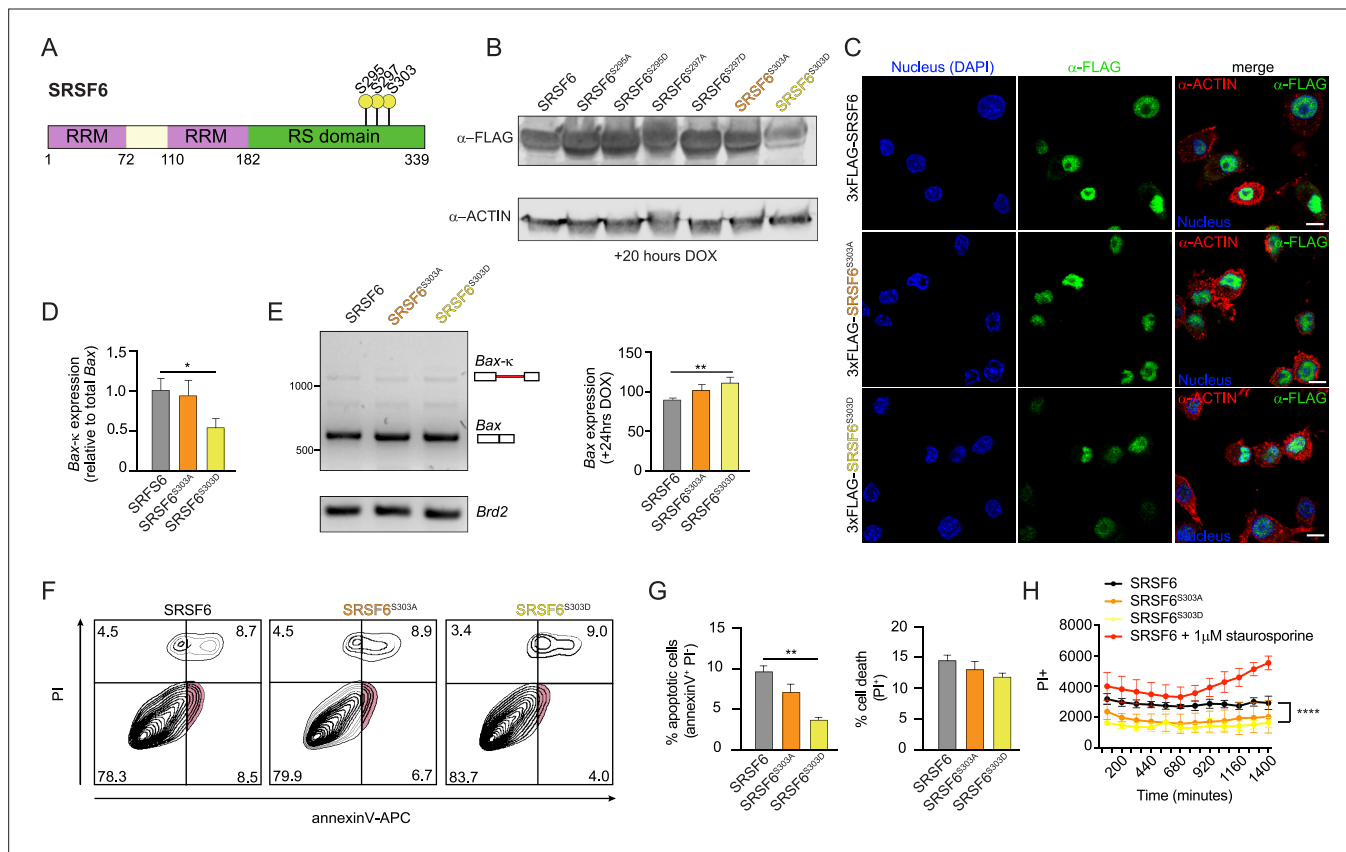

**Figure 6.** Phosphorylation of SRSF6 at S303 promotes splicing of *Bax* to limit *Bax-κ* expression and prevent cell death. **(A)** Diagram of differentially phosphorylated residues in SRSF6 according to [Budzik et al., 2020](#). **(B)** Immunoblot of FLAG tagged SRSF6, SRSF6<sup>S295A</sup>, SRSF6<sup>S297D</sup>, SRSF6<sup>S303A</sup>, and SRSF6<sup>S303D</sup> inducible RAW MΦ expressed for 24 hr after DOX induction. **(C)** Immunofluorescence microscopy images visualizing 3x-FLAG tagged SRSF6, SRSF6<sup>S303A</sup>, and SRSF6<sup>S303D</sup> inducible RAW MΦ expressed for 24 hr after DOX induction. Scale bar = 10 μm. **(D)** RT-qPCR of *Bax*203 in FLAG-tagged SRSF6, SRSF6<sup>S303A</sup>, and SRSF6<sup>S303D</sup> inducible RAW MΦ after DOX induction for 24 hr. **(E)** Semi-quantitative RT-PCR of *Bax* and *Brd2* (control) in FLAG-tagged SRSF6, SRSF6<sup>S303A</sup>, and SRSF6<sup>S303D</sup> inducible RAW MΦ expressed for 24 hr after DOX induction with quantification of multiple independent experiment. Representative gel shown. **(F)** Apoptotic cell death measured by flow cytometry using annexinV-APC and PI in FLAG tagged SRSF6, SRSF6<sup>S303A</sup>, and SRSF6<sup>S303D</sup> inducible RAW MΦ expressed for 24 hr after DOX induction. **(G)** % apoptotic cells and % dead cells from D. **(H)** Cell death over a time course in FLAG tagged SRSF6, SRSF6<sup>S303A</sup>, and SRSF6<sup>S303D</sup> inducible RAW MΦ. FLAG-tagged SRSF6 inducible RAW MΦ were treated with 1 μM staurosporine as a positive control. Data are expressed as a mean of three or more biological replicates with error bars depicting SEM. Statistical significance was determined using two tailed unpaired student's t test. \*= $p < 0.05$ , \*\*= $p < 0.01$ , \*\*\*= $p < 0.001$ , \*\*\*\*= $p < 0.0001$ .

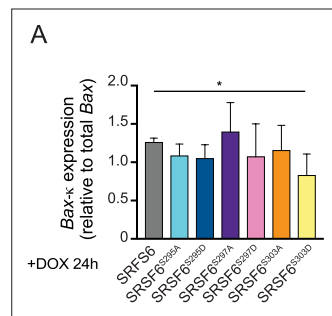

**Figure 6—figure supplement 1.** Expression of SRSF6-S303D reduces Bax- $\kappa$  expression. **(A)** RT-qPCR of Bax203 in FLAG tagged SRSF6, SRSF6<sup>S295A</sup>, SRSF6<sup>S295D</sup>, SRSF6<sup>S297A</sup>, SRSF6<sup>S297D</sup>, SRSF6<sup>S303A</sup>, and SRSF6<sup>S303D</sup> doxycycline-inducible RAW M $\Phi$  expressed for 24 hr after DOX induction. Data are expressed as a mean of three or more biological replicates with error bars depicting SEM. Statistical significance was determined using two tailed unpaired student's *t* test. \*=*p* < 0.05, \*\*=*p* < 0.01, \*\*\*=*p* < 0.001, \*\*\*\*=*p* < 0.0001.



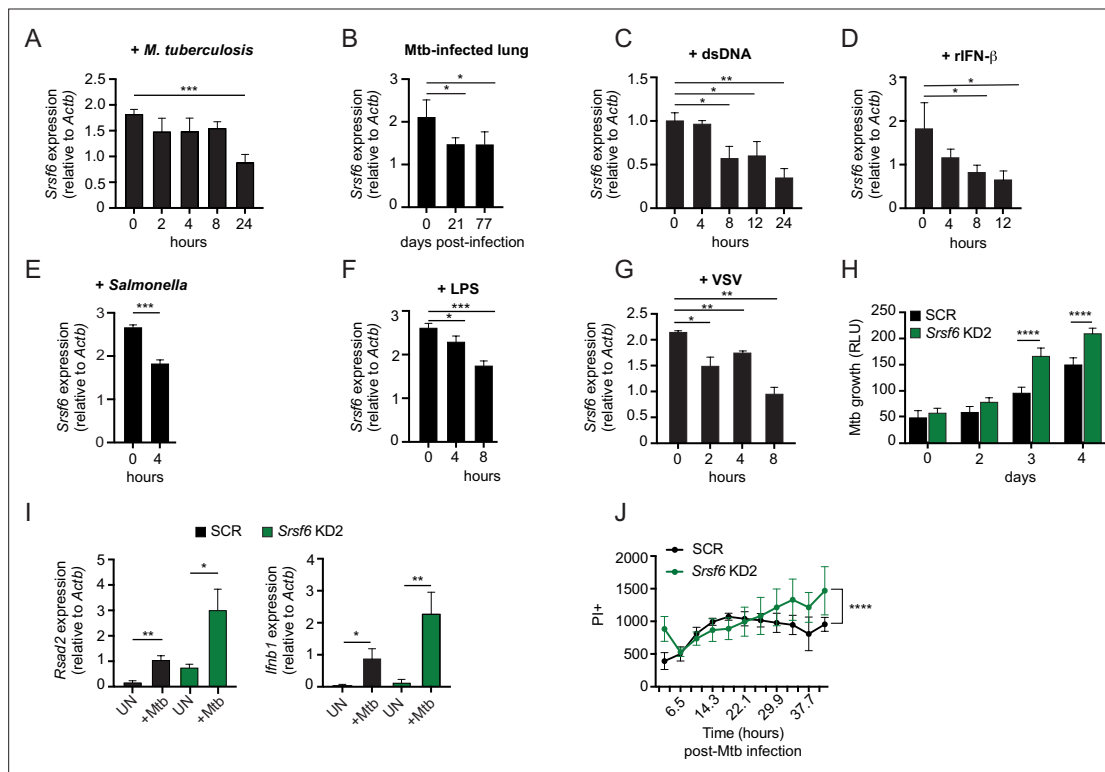

**Figure 7.** Modulation of SRSF6 expression contributes to innate immune control of the intracellular bacterial pathogen *M. tuberculosis*. **(A)** RT-qPCR of *Srsf6* in RAW MΦ infected with *M. tuberculosis* (Mtb) (MOI = 5) over a time course. **(B)** RT-qPCR of *Srsf6* in Mtb-infected mouse lung samples over a time course of *in vivo* infection. **(C)** RT-qPCR of *Srsf6* in RAW MΦ treated with 1 μg double stranded DNA (dsDNA). over a time course. **(D)** As in C but treated with recombinant IFN-β (rIFN-β). **(E)** RT-qPCR of *Srsf6* in *S. enterica* (Typhimurium) infected RAW MΦ (MOI = 5) at 0 and 4 hr. **(F)** As in C but treated with LPS. **(G)** RT-qPCR of *Srsf6* in VSV infected RAW MΦ (MOI = 1) over a time course. **(H)** *Mtb luxBCADE* growth in *Srsf6* KD RAW MΦ measured by relative light units (RLUs) over a time course (MOI = 1). **(I)** RT-qPCR of *Rsad2* and *Ifnb1* in *Srsf6* KD RAW MΦ infected with Mtb at (MOI = 10), 4 hr post-infection. **(J)** Cell death over a time course in SCR and *Srsf6* KD RAW MΦ infected with Mtb at (MOI = 5). All data are compared with a SCR control unless indicated. Data are expressed as a mean of three or more biological replicates with error bars depicting SEM. Statistical significance was determined using two tailed unpaired student's t test. \**p* < 0.05, \*\**p* < 0.01, \*\*\**p* < 0.001, \*\*\*\**p* < 0.0001.
