# Supplementary figures and images for: SRSF6 balances mitochondrial-driven innate immune outcomes through alternative splicing of BAX
Source: eLife journal article supplement (doi:10.7554/elife.82244), 2022-11-21

G

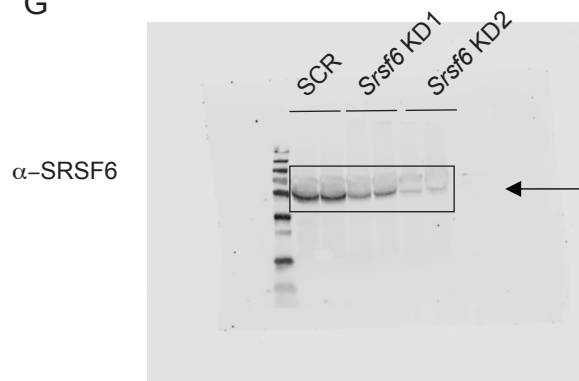 $\alpha$ -ACTIN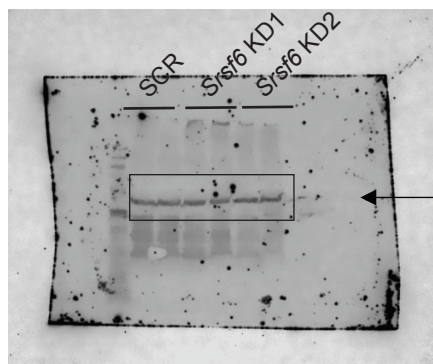

J

 $\alpha$ -RSAD2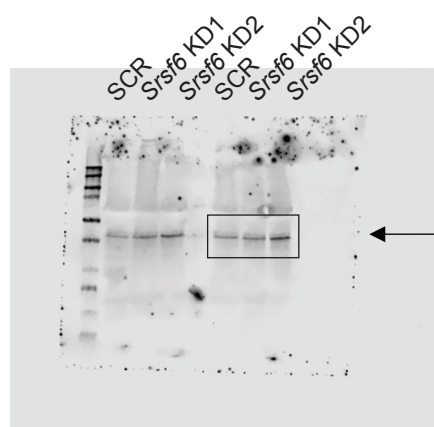 $\alpha$ -TUBULIN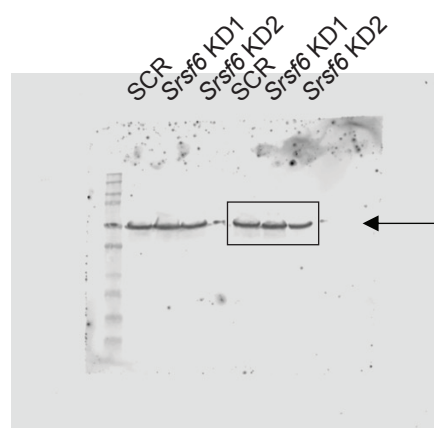

L

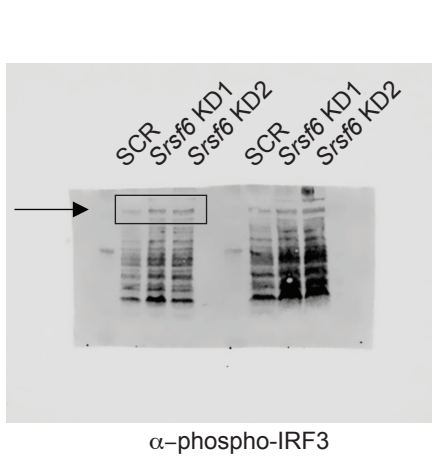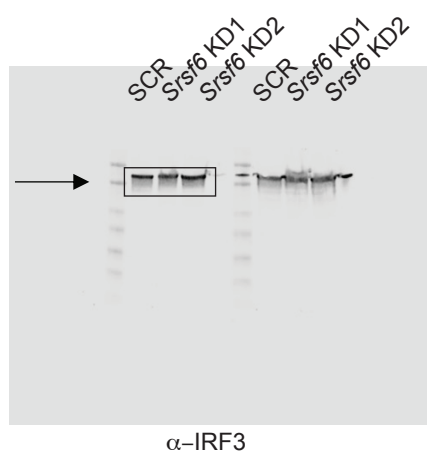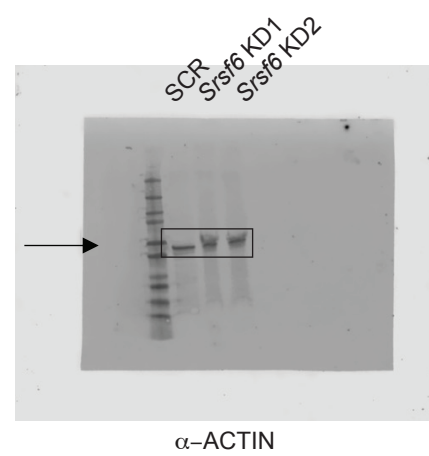

Figure 1. Source Data

Supplement: fig1-data1 [file eLIFE Figure 1, Source Data 1.pdf › Source Data Figure 1/eLIFE Figure 1, Source Data 1.pdf]

A

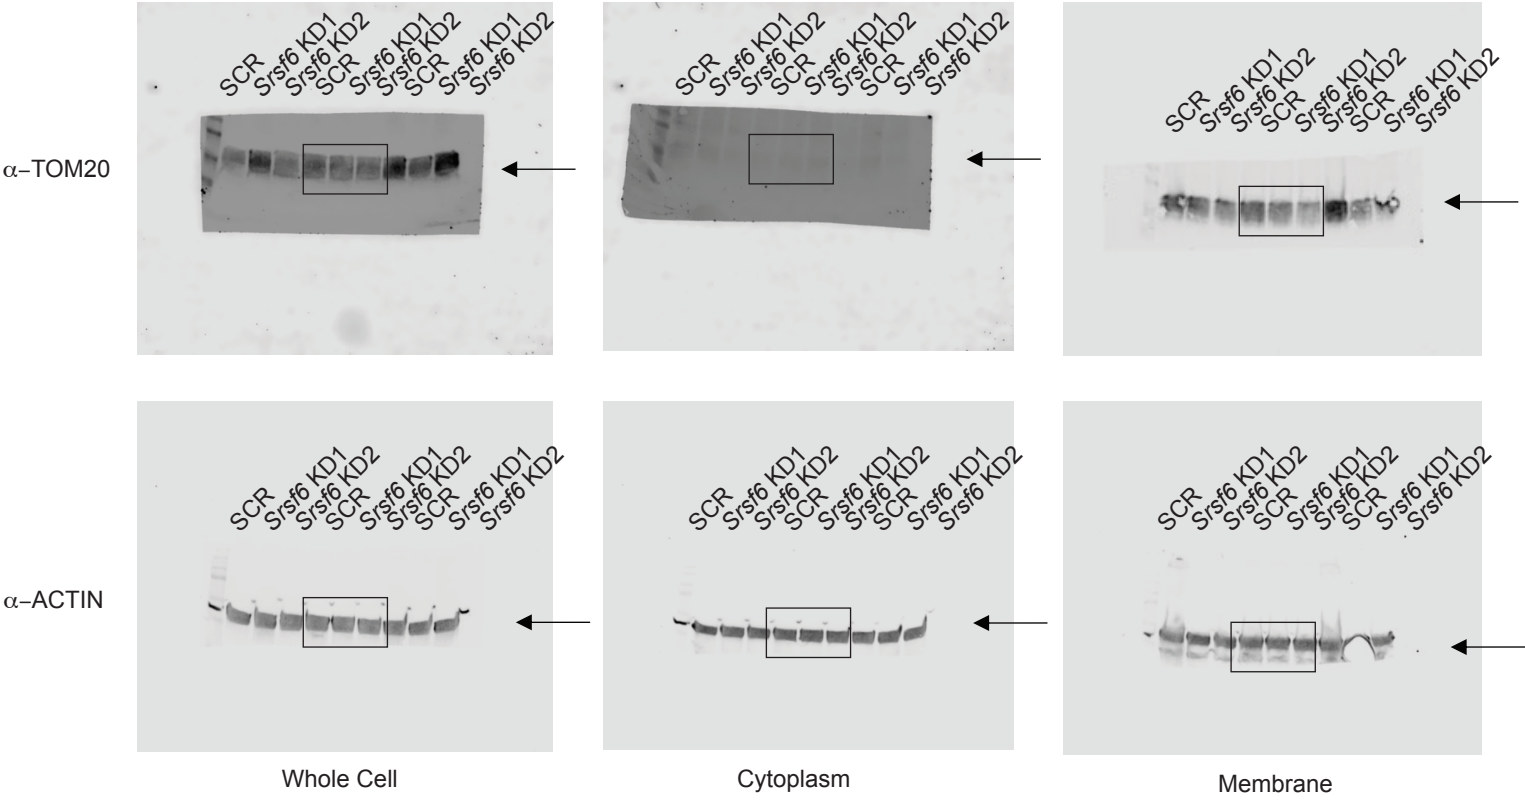

\* last three lanes treated with ABT737 and Q-vD-OPH

Figure 2. Source Data

Supplement: fig2-data1 [file elife-82244-fig2-data1-v2.zip]

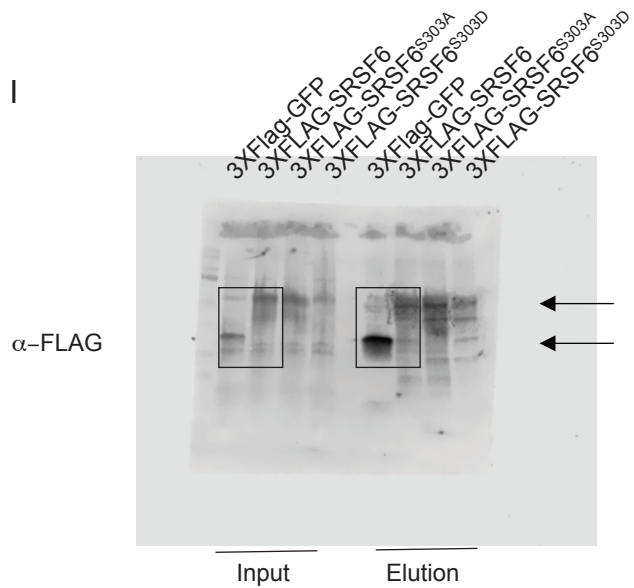

Figure 3. Source Data

Supplement: fig3-data1 [file elife-82244-fig3-data1-v2.zip]

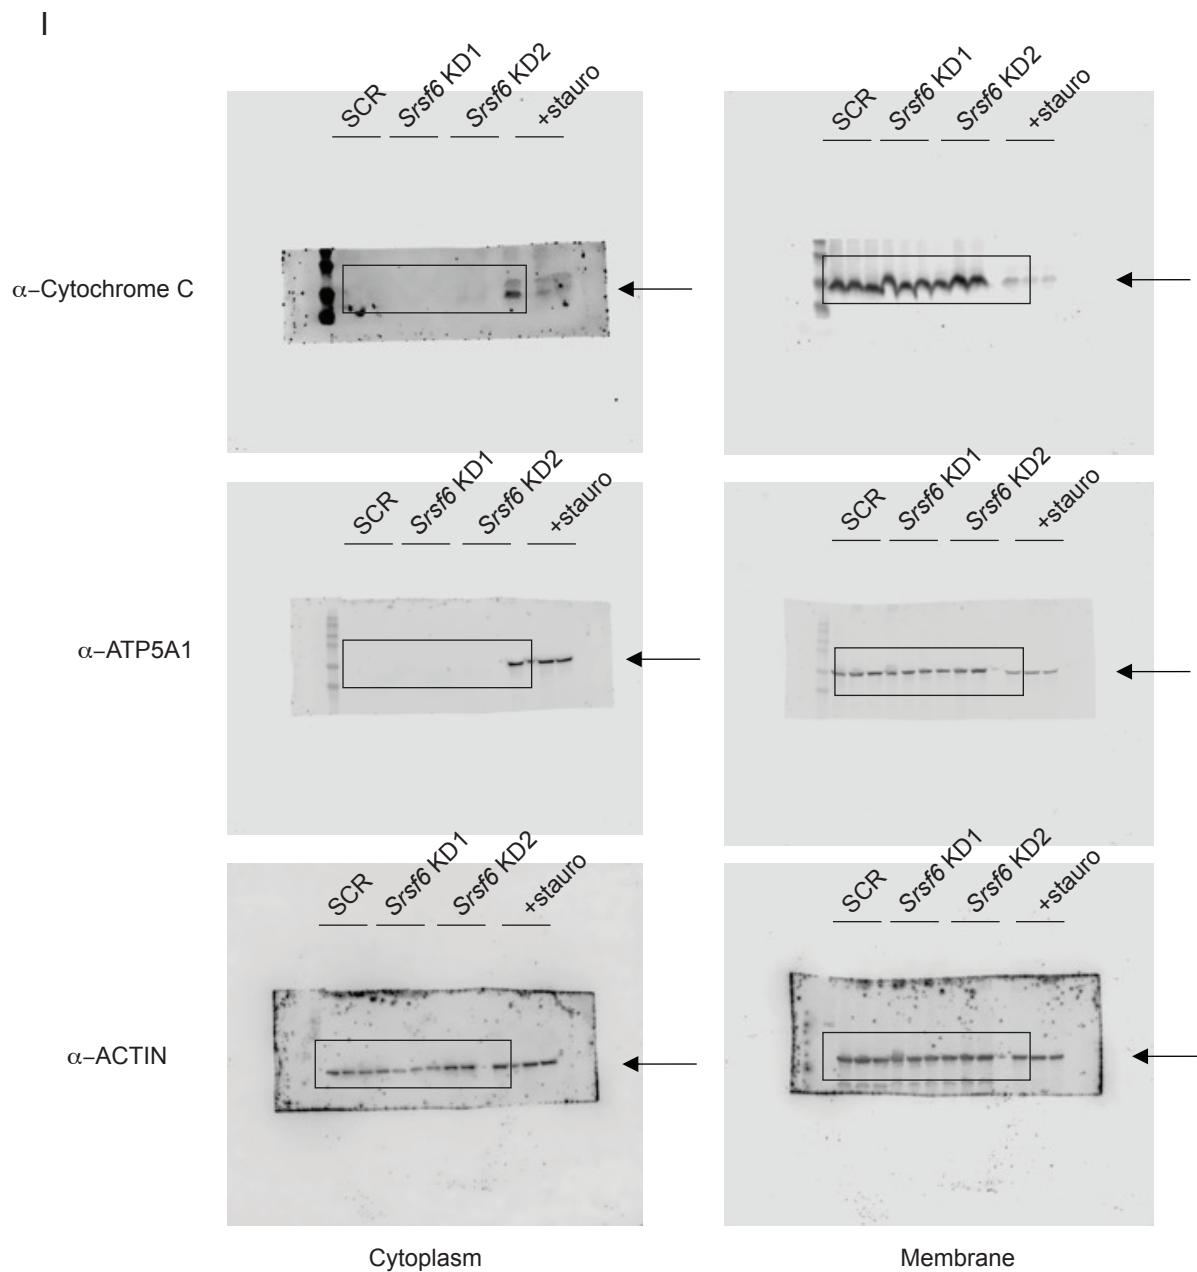

Figure 4. Source Data

Supplement: fig4-data1 [file elife-82244-fig4-data1-v2.zip]

A

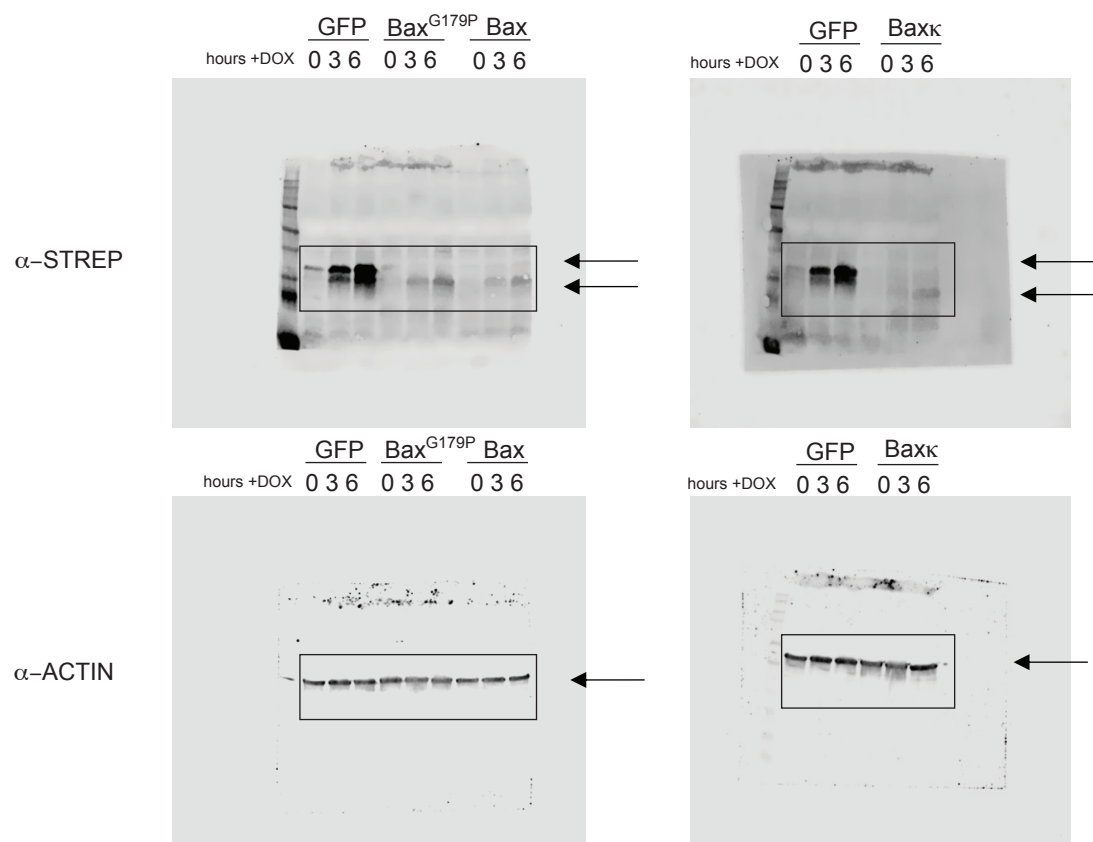

Figure 5. Source Data

Supplement: fig5-data1 [file elife-82244-fig5-data1-v2.zip]

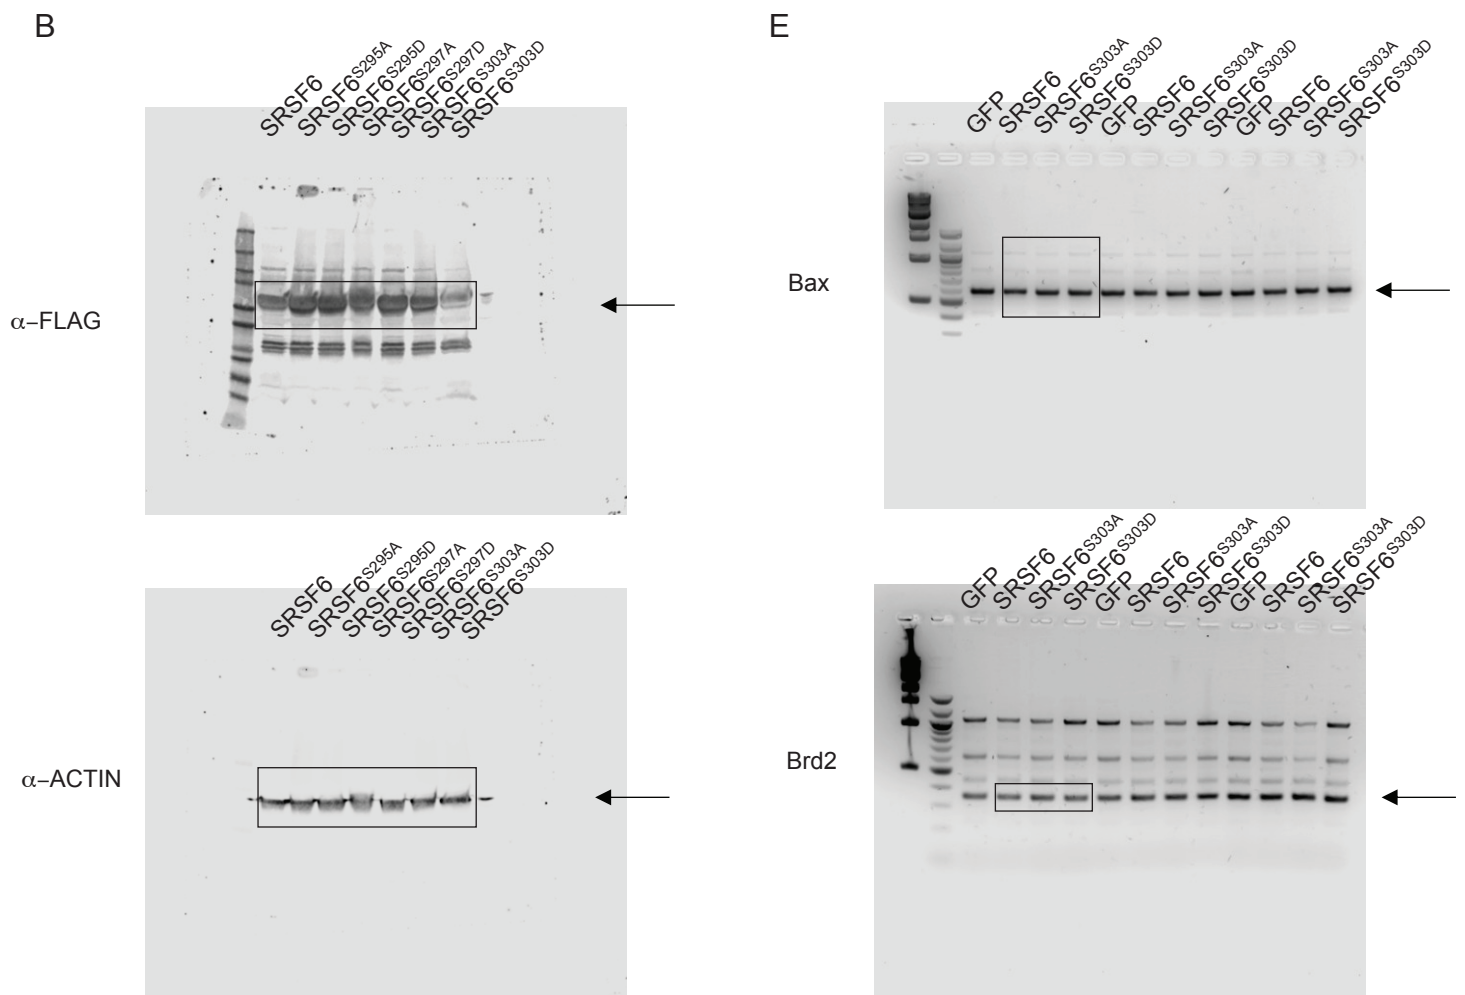

Figure 6. Source Data

Supplement: fig6-data1 [file elife-82244-fig6-data1-v2.zip]
